# Supplementary material
Source: PubMed Central journal article supplement (PMC3415598)
Supplement: NIHMS369861-supplement-1_si_001.pdf [file NIHMS369861-supplement-1_si_001.pdf]

## Supporting information

### Coupled motion in proteins revealed by pressure perturbation

Yinan Fu,<sup>†</sup> Vignesh Kasinath,<sup>†</sup> Veronica R. Moorman,<sup>†</sup> Nathaniel V. Nucci,<sup>†</sup> Vincent J. Hilser<sup>†</sup>

& A. Joshua Wand<sup>†\*</sup>

<sup>†</sup> Graduate Group in Biochemistry and Molecular Biophysics and Department of Biochemistry & Biophysics, University of Pennsylvania, Philadelphia, Pennsylvania 19104 USA

<sup>†</sup> Department of Biology, Johns Hopkins University, Baltimore, Maryland 21218 USA

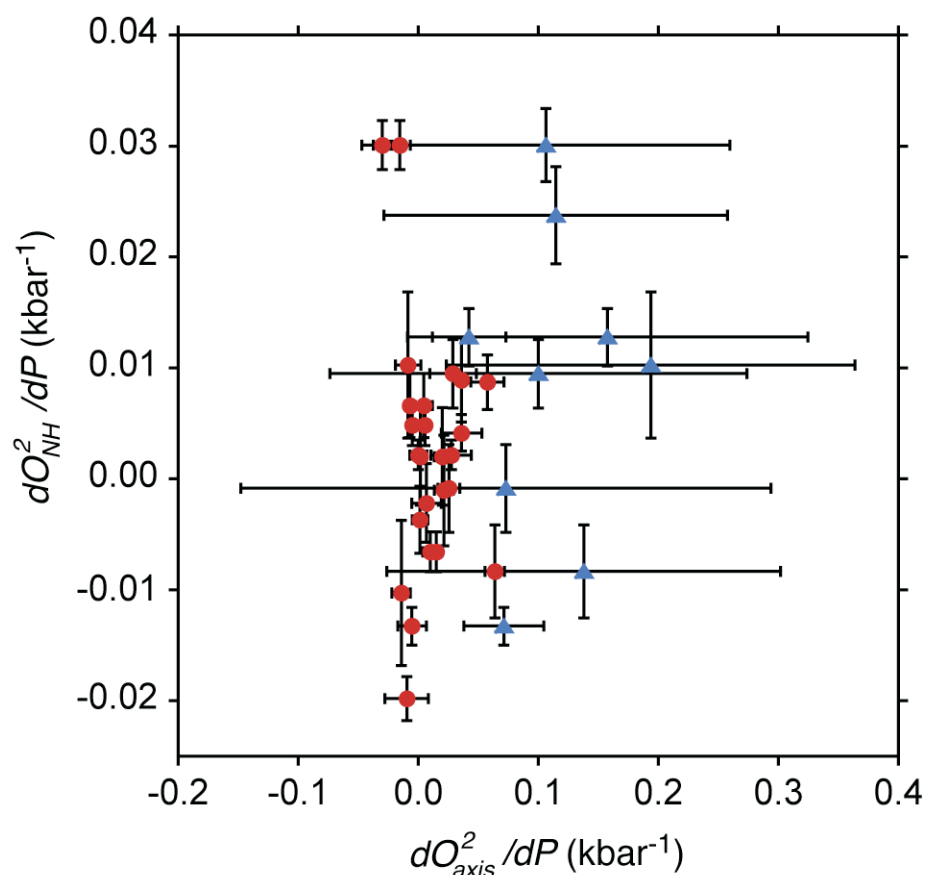

**Figure S1.** The pressure sensitivity of backbone and methyl-bearing side chain motion is uncorrelated ( $R < 0.03$ ). Solid red circles and solid blue triangles correspond to methyls with a purely linear pressure response and those with a non-linear pressure response, respectively. For the latter, the first order term from the fitted Taylor expansion is used, which have generally lower precision than that derived from the purely linear response sites. The lack of correlation indicates that the motion of the main chain and methyl-bearing side chains are largely decoupled.

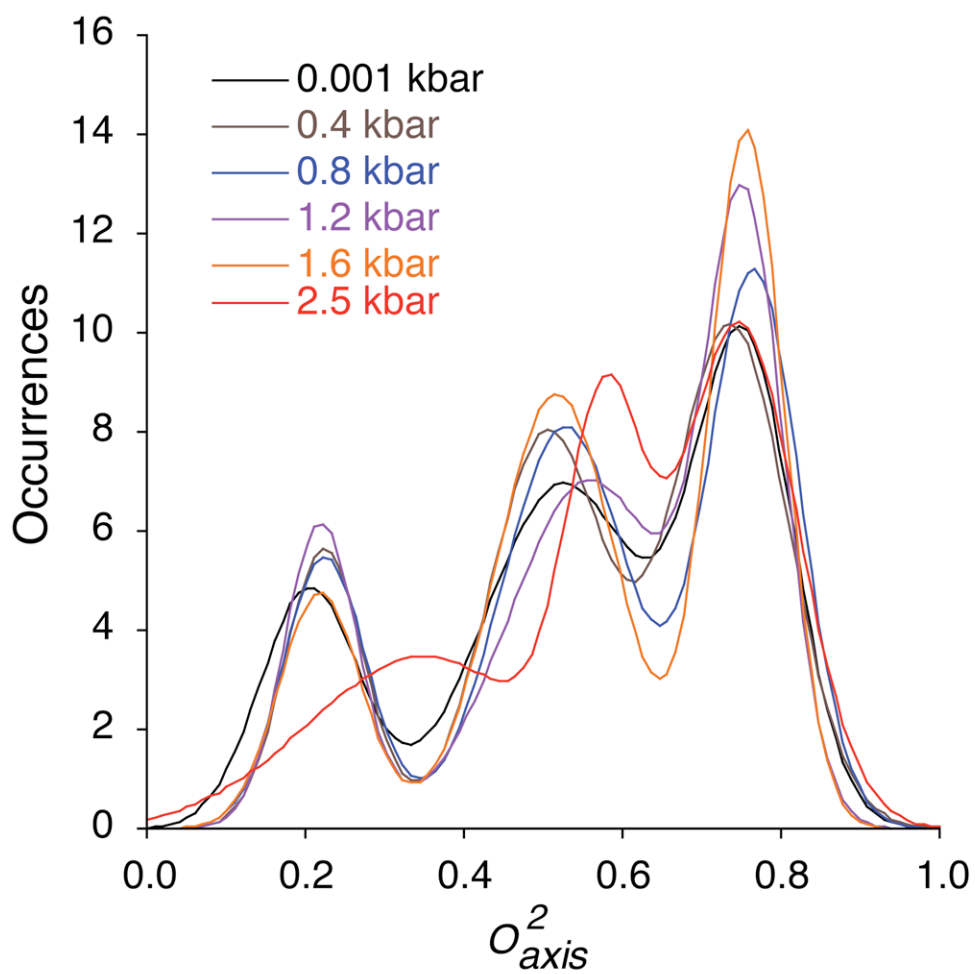

**Figure S2.** Overlay of fitted tri-Gaussian distributions of the methyl symmetry axis squared generalized order parameter at 0.001, 0.4, 0.8, 1.2, 1.6 and 2.5 kbar. The fitting parameters and statistics are listed in Table S4.

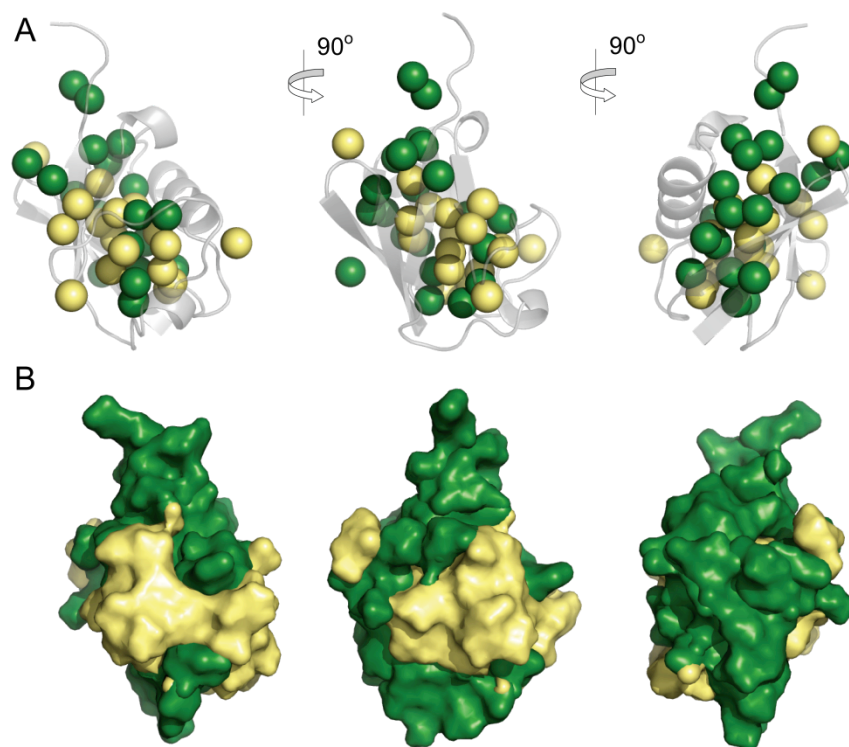

**Figure S3.** (A) Spatial distribution of methyl bearing side chains that have linear relation between  $O^2_{axis}$  and  $dO^2_{axis}/dP$  (yellow) and the remaining methyls (green). Exhaustive randomization statistical tests confirm that the groups (excluding L7382) are spatially clustered within the molecular structure ( $p < 0.01$ ). (B) Each atom including added hydrogens in the 1 bar crystal structure (PDB 1UBQ) was assigned to a group based on the group identity of the nearest analyzed probe's methyl carbon. Surface renderings were made for each cluster and colored accordingly. Hydrogen atoms were added and molecular images were generated using PyMOL.

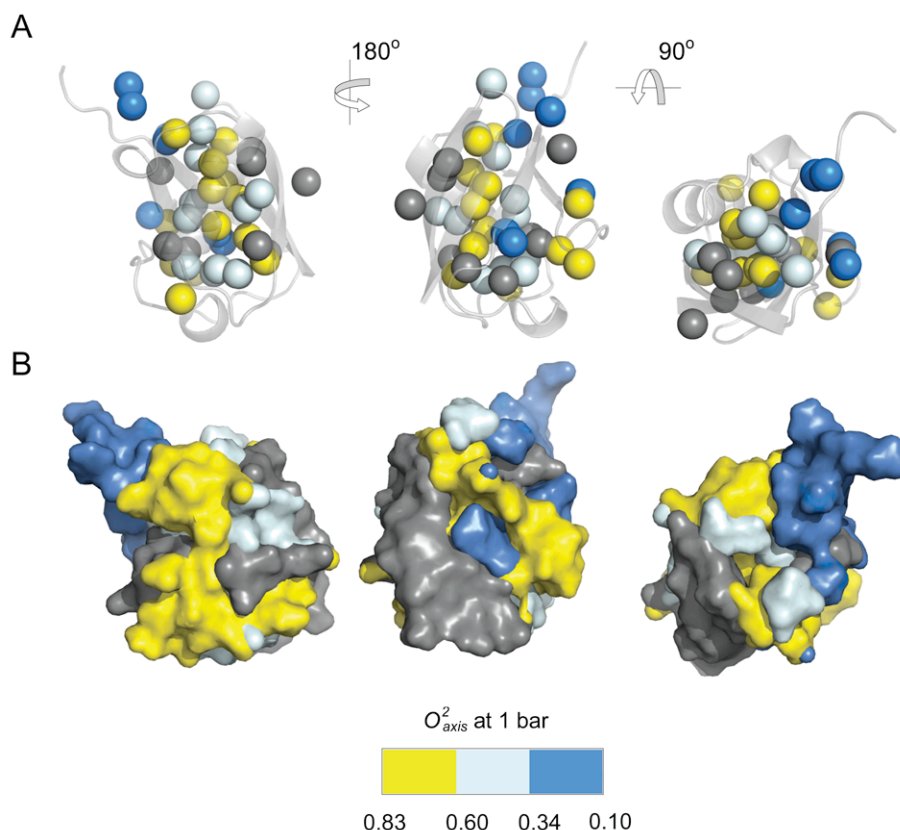

**Figure S4.** Spatial clustering of fast methyl side chain motion in ubiquitin at ambient pressure. A) Different orientations of the crystal structure of ubiquitin (PDB 1UBQ) represented as a ribbon with side chain methyl carbons shown as spheres and colored (see the color bar) according to their membership in three groups derived from a k-means analysis of  $O^2_{axis}$  values at 1 bar (see Methods). The methyls that do not have a linear dynamic response to pressure were grouped separately and are colored gray. Exhaustive randomization statistical tests confirm that the groups (excluding T22 $\gamma$ 2 and A46 $\beta$ ) are spatially clustered within the molecular structure ( $p < 0.05$ ). These regions are emphasized in B) where each atom including added hydrogens in the crystal structure (PDB 1UBQ) was assigned to a group based on the group identity of the nearest analyzed methyl carbon probe. Surface renderings were made for each group and colored accordingly. Hydrogen atoms were added and molecular images were generated using PyMOL.

**Table S1.** Pressure dependence of ubiquitin backbone amide N-H squared generalized order parameters.<sup>a</sup>

| ID  | $O_{NH}^2$<br>at 0.001 kbar | $O_{NH}^2$<br>at 0.4 kbar | $O_{NH}^2$<br>at 0.8 kbar | $O_{NH}^2$<br>at 1.2 kbar | $O_{NH}^2$<br>at 1.6 kbar | $O_{NH}^2$<br>at 2.5 kbar | $dO_{NH}^2/dP$<br>$\times 10^3$ (kbar <sup>-1</sup> )<br>1) |
|-----|-----------------------------|---------------------------|---------------------------|---------------------------|---------------------------|---------------------------|-------------------------------------------------------------|
| Q2  | 0.79±0.011                  | 0.86±0.008                | 0.86±0.002                | 0.87±0.003                | 0.87±0.004                | 0.86±0.006                | 2.7±3.2                                                     |
| I3  | 0.87±0.004                  | 0.90±0.008                | 0.90±0.006                | 0.91±0.004                | 0.90±0.003                | 0.93±0.006                | 9.5±3.1                                                     |
| F4  | 0.81±0.004                  | n.d. <sup>b</sup>         | n.d.                      | 0.91±0.005                | 0.92±0.004                | 0.93±0.006                | 2.3±3.1                                                     |
| V5  | 0.76±0.008                  | 0.82±0.005                | 0.85±0.003                | 0.84±0.005                | 0.85±0.004                | 0.84±0.007                | 6.6±2.9                                                     |
| K6  | 0.75±0.006                  | 0.83±0.006                | 0.76±0.011                | 0.88±0.004                | 0.87±0.005                | 0.93±0.010                | 58.0±4.8                                                    |
| T7  | 0.70±0.008                  | 0.86±0.005                | 0.87±0.003                | 0.89±0.005                | 0.87±0.006                | n.d.                      | 8.9±3.8                                                     |
| L8  | 0.77±0.005                  | 0.81±0.006                | 0.85±0.004                | 0.84±0.004                | 0.82±0.005                | 0.83±0.005                | 8.7±2.5                                                     |
| T9  | 0.85±0.006                  | 0.75±0.008                | 0.78±0.005                | 0.79±0.004                | 0.75±0.006                | 0.75±0.007                | -2.2±3.6                                                    |
| G10 | 0.84±0.005                  | 0.69±0.012                | 0.78±0.002                | 0.77±0.001                | 0.74±0.005                | 0.76±0.006                | 11.6±3.4                                                    |
| K11 | 0.85±0.002                  | 0.73±0.006                | 0.74±0.007                | 0.73±0.008                | 0.70±0.008                | 0.71±0.016                | -0.9±6.1                                                    |
| T12 | 0.90±0.004                  | 0.77±0.007                | 0.77±0.005                | 0.79±0.007                | 0.79±0.006                | n.d.                      | 13.7±4.4                                                    |
| I13 | 0.86±0.001                  | 0.86±0.008                | n.d.                      | n.d.                      | 0.86±0.004                | 0.89±0.004                | 12.8±2.6                                                    |
| T14 | 0.86±0.002                  | 0.85±0.006                | 0.87±0.004                | 0.87±0.002                | 0.88±0.004                | n.d.                      | 30.1±3.3                                                    |
| L15 | n.d.                        | 0.87±0.003                | 0.87±0.003                | 0.91±0.002                | 0.90±0.003                | n.d.                      | 30.1±2.2                                                    |
| V17 | 0.87±0.004                  | 0.89±0.003                | 0.90±0.004                | n.d.                      | n.d.                      | n.d.                      | 10.3±6.6                                                    |
| E18 | 0.97±0.009                  | n.d.                      | n.d.                      | 0.87±0.004                | 0.89±0.004                | 0.87±0.004                | 5.1±1.5                                                     |
| S20 | 0.90±0.004                  | 0.85±0.006                | 0.86±0.004                | 0.88±0.005                | 0.87±0.008                | 0.85±0.005                | 0.1±2.4                                                     |
| D21 | 0.91±0.005                  | 0.93±0.005                | 0.96±0.006                | 0.94±0.005                | 0.99±0.009                | 0.93±0.006                | 1.3±3.4                                                     |
| T22 | n.d.                        | 0.86±0.004                | 0.89±0.005                | 0.85±0.009                | 0.86±0.007                | 0.86±0.007                | -3.7±3.0                                                    |
| I23 | 0.94±0.003                  | 0.97±0.006                | 0.96±0.007                | 0.96±0.003                | 0.97±0.007                | 0.97±0.008                | -0.9±3.9                                                    |
| V26 | 0.90±0.004                  | 0.90±0.006                | 0.89±0.003                | n.d.                      | n.d.                      | n.d.                      | 0.0±18.1                                                    |
| K27 | 0.91±0.002                  | 0.95±0.004                | 0.87±0.005                | n.d.                      | 0.98±0.005                | 0.94±0.004                | -10.3±6.5                                                   |
| A28 | 0.93±0.005                  | 0.95±0.004                | 0.94±0.005                | 0.94±0.003                | 0.97±0.004                | 0.96±0.004                | 17.9±2.3                                                    |
| K29 | 0.84±0.005                  | 0.90±0.005                | 0.86±0.007                | 0.92±0.003                | 0.95±0.003                | 0.92±0.004                | 10.5±2.7                                                    |
| I30 | 0.89±0.004                  | 0.92±0.003                | 0.91±0.003                | 0.91±0.005                | 0.91±0.004                | 0.92±0.004                | 6.4±2.0                                                     |
| D32 | 0.80±0.006                  | 0.93±0.004                | 0.91±0.003                | 0.91±0.003                | 0.93±0.004                | 0.93±0.003                | 4.8±1.9                                                     |
| K33 | 0.87±0.002                  | 0.85±0.005                | 0.83±0.008                | 0.85±0.006                | 0.82±0.009                | 0.95±0.004                | 6.4±1.5                                                     |
| E34 | 0.88±0.004                  | 0.85±0.005                | 0.85±0.004                | 0.86±0.004                | 0.86±0.004                | 0.88±0.006                | 10.8±2.5                                                    |
| G35 | 0.88±0.002                  | 0.91±0.005                | 0.92±0.006                | 0.90±0.003                | 0.91±0.005                | 0.91±0.003                | 16.9±2.6                                                    |
| I36 | 0.85±0.002                  | 0.80±0.007                | 0.80±0.008                | 0.79±0.010                | 0.83±0.007                | 0.79±0.010                | 7.0±1.9                                                     |
| D39 | 0.86±0.003                  | 0.90±0.002                | 0.90±0.004                | n.d.                      | n.d.                      | 0.91±0.007                | 2.0±4.4                                                     |

|     |            |            |            |            |            |            |           |
|-----|------------|------------|------------|------------|------------|------------|-----------|
| Q40 | 0.84±0.004 | 0.89±0.006 | 0.90±0.003 | 0.89±0.001 | 0.91±0.004 | 0.90±0.003 | 14.5±2.9  |
| Q41 | 0.76±0.006 | 0.88±0.002 | 0.88±0.002 | 0.88±0.002 | 0.88±0.004 | 0.88±0.002 | 6.1±1.8   |
| I44 | 0.87±0.004 | 0.87±0.002 | 0.86±0.002 | 0.87±0.001 | 0.86±0.003 | 0.87±0.003 | 1.4±1.1   |
| A46 | 0.81±0.007 | 0.90±0.005 | 0.86±0.004 | 0.87±0.005 | 0.82±0.004 | 0.83±0.004 | 2.1±1.3   |
| G47 | 0.86±0.005 | 0.85±0.003 | 0.84±0.002 | 0.86±0.002 | 0.84±0.002 | 0.84±0.003 | -19.8±2.0 |
| Q49 | 0.88±0.005 | 0.78±0.006 | 0.76±0.008 | 0.78±0.004 | 0.79±0.005 | 0.79±0.003 | -1.5±1.6  |
| L50 | 0.93±0.005 | 0.86±0.003 | 0.87±0.004 | 0.87±0.003 | 0.85±0.004 | 0.83±0.004 | 10.0±2.3  |
| D52 | 0.90±0.002 | 0.80±0.006 | 0.81±0.007 | 0.82±0.006 | 0.82±0.006 | 0.82±0.005 | -13.3±1.7 |
| R54 | 0.93±0.004 | 0.88±0.004 | 0.89±0.004 | 0.88±0.002 | 0.91±0.004 | 0.88±0.004 | 8.4±2.9   |
| T55 | 0.85±0.004 | 0.90±0.007 | 0.91±0.003 | 0.90±0.002 | 0.90±0.003 | 0.90±0.002 | 9.8±1.9   |
| L56 | 0.88±0.003 | 0.94±0.005 | 0.94±0.002 | 0.91±0.003 | 0.92±0.004 | 0.92±0.002 | 2.4±2.0   |
| S57 | n.d.       | 0.90±0.002 | 0.91±0.003 | n.d.       | n.d.       | 0.90±0.003 | -6.6±1.8  |
| D58 | 0.73±0.010 | 0.90±0.003 | 0.92±0.003 | 0.92±0.002 | 0.93±0.003 | 0.90±0.002 | -1.3±1.4  |
| Y59 | 0.83±0.006 | 0.87±0.003 | 0.85±0.006 | 0.87±0.004 | 0.85±0.004 | 0.87±0.003 | -6.9±1.5  |
| N60 | 0.89±0.011 | 0.90±0.004 | 0.89±0.003 | 0.91±0.009 | 0.90±0.007 | 0.91±0.009 | 5.5±1.6   |
| I61 | 0.87±0.003 | n.d.       | n.d.       | 0.90±0.003 | 0.91±0.004 | 0.89±0.005 | 6.4±3.5   |
| Q62 | 0.86±0.003 | 0.75±0.013 | 0.73±0.014 | 0.73±0.014 | 0.74±0.011 | 0.72±0.013 | -8.3±4.2  |
| K63 | 0.87±0.002 | 0.86±0.004 | 0.85±0.004 | 0.85±0.006 | 0.91±0.005 | 0.87±0.007 | -4.9±6.0  |
| E64 | 0.87±0.002 | 0.91±0.009 | 0.90±0.003 | 0.91±0.004 | 0.88±0.006 | 0.92±0.005 | 19.5±3.2  |
| S65 | 0.91±0.004 | 0.89±0.004 | 0.90±0.002 | 0.90±0.003 | 0.88±0.002 | 0.88±0.003 | 5.3±3.9   |
| T66 | 0.79±0.011 | 0.84±0.004 | 0.87±0.004 | 0.87±0.006 | 0.85±0.004 | n.d.       | -0.1±1.6  |
| L67 | 0.87±0.004 | 0.87±0.002 | n.d.       | n.d.       | 0.86±0.005 | 0.88±0.004 | 4.1±3.5   |
| H68 | 0.81±0.004 | 0.88±0.004 | 0.87±0.00  | 0.84±0.004 | 0.90±0.004 | 0.89±0.003 | 4.1±1.6   |
| V70 | 0.76±0.008 | 0.92±0.005 | 0.95±0.01  | 0.98±0.014 | 0.97±0.011 | 0.96±0.010 | 7.4±1.5   |
| L71 | 0.75±0.006 | 0.86±0.005 | 0.83±0.01  | 0.84±0.011 | 0.87±0.010 | 0.84±0.009 | 23.8±4.4  |

<sup>a</sup> Rotational diffusion tensors were determined using the statistical analysis of the <sup>15</sup>N relaxation data largely as suggested by Bax and coworkers (19) with small modification of the reduced fitting error function (see Methods). The ambient pressure crystal structure (1UBQ) was used for data collected at 1, 400 and 800 bar. The high-pressure solution structure (1V81) was used for higher pressures. A grid search method with local refinement of model-free parameters was employed (40). A fully anisotropic diffusion model was statistically warranted for data at all pressures ( $p < 0.05$ ). The anisotropy ( $2D_z/[D_x+D_y]$ ) was 1.085 or less at all pressures. Those amides whose signals cannot be satisfactorily resolved in relaxation spectra at the given pressure are designated as ‘not determined’ (n.d.). Errors were determined by Monte Carlo sampling of observed  $T_1$ ,  $T_2$  and NOE values based on errors estimated from replicate sampling and noise estimation.

**Table S2.** Pressure dependence of ubiquitin methyl symmetry axis squared generalized order parameters.<sup>a</sup>

| ID    | $O^2_{axis}$<br>at 0.001 kbar | $O^2_{axis}$<br>at 0.4 kbar | $O^2_{axis}$<br>at 0.8 kbar | $O^2_{axis}$<br>at 1.2 kbar | $O^2_{axis}$<br>at 1.6 kar | $O^2_{axis}$<br>at 2.5 kbar |
|-------|-------------------------------|-----------------------------|-----------------------------|-----------------------------|----------------------------|-----------------------------|
| I3δ1  | 0.651±0.014                   | 0.663±0.040                 | 0.665±0.045                 | 0.718±0.039                 | 0.705±0.040                | 0.717±0.047                 |
| I3γ2  | 0.818±0.006                   | 0.835±0.052                 | 0.832±0.054                 | 0.787±0.049                 | 0.778±0.047                | 0.810±0.053                 |
| V5γ1  | 0.754±0.024                   | 0.768±0.008                 | 0.756±0.007                 | 0.767±0.007                 | 0.742±0.002                | 0.778±0.004                 |
| V5γ2  | 0.736±0.010                   | 0.750±0.008                 | 0.736±0.007                 | 0.742±0.004                 | 0.725±0.004                | 0.726±0.007                 |
| T7γ2  | 0.734±0.005                   | 0.707±0.006                 | 0.756±0.002                 | 0.762±0.002                 | 0.786±0.005                | 0.806±0.001                 |
| L8δ1  | 0.209±0.002                   | 0.235±0.041                 | 0.243±0.039                 | 0.282±0.037                 | 0.285±0.037                | 0.358±0.030                 |
| T9γ2  | 0.586±0.035                   | 0.576±0.011                 | 0.594±0.012                 | 0.599±0.014                 | 0.590±0.015                | 0.600±0.022                 |
| I13δ1 | 0.475±0.012                   | 0.493±0.007                 | 0.508±0.007                 | 0.514±0.006                 | 0.512±0.005                | 0.520±0.018                 |
| I13γ2 | 0.514±0.020                   | 0.568±0.012                 | 0.570±0.012                 | 0.569±0.011                 | 0.572±0.010                | 0.617±0.034                 |
| T14γ2 | 0.614±0.013                   | 0.633±0.011                 | 0.629±0.010                 | 0.599±0.013                 | 0.580±0.010                | 0.610±0.006                 |
| L15δ1 | 0.457±0.002                   | 0.443±0.010                 | 0.463±0.008                 | 0.395±0.026                 | 0.415±0.023                | 0.388±0.019                 |
| L15δ2 | 0.449±0.018                   | 0.463±0.015                 | 0.465±0.016                 | 0.425±0.024                 | 0.421±0.024                | 0.427±0.017                 |
| V17γ1 | 0.764±0.003                   | 0.800±0.028                 | 0.818±0.028                 | 0.787±0.023                 | 0.754±0.027                | 0.782±0.032                 |
| V17γ2 | 0.750±0.003                   | 0.750±0.023                 | 0.770±0.025                 | 0.762±0.026                 | 0.740±0.026                | 0.732±0.026                 |
| T22γ2 | 0.802±0.022                   | 0.867±0.007                 | 0.853±0.006                 | 0.846±0.005                 | 0.847±0.006                | 0.828±0.005                 |
| I23δ1 | 0.455±0.016                   | 0.485±0.022                 | 0.489±0.022                 | 0.500±0.023                 | 0.505±0.020                | 0.526±0.019                 |
| I23γ2 | 0.748±0.033                   | 0.760±0.008                 | 0.762±0.007                 | 0.737±0.007                 | 0.726±0.006                | 0.740±0.005                 |
| V26γ1 | 0.756±0.007                   | 0.762±0.022                 | 0.754±0.021                 | 0.767±0.021                 | 0.748±0.020                | 0.721±0.015                 |
| I30δ1 | 0.685±0.004                   | 0.699±0.006                 | 0.695±0.006                 | 0.708±0.004                 | 0.719±0.003                | 0.695±0.005                 |
| I30γ2 | 0.830±0.010                   | 0.841±0.007                 | 0.816±0.007                 | 0.851±0.004                 | 0.837±0.007                | 0.814±0.008                 |
| I36δ1 | 0.477±0.003                   | 0.493±0.018                 | 0.499±0.016                 | 0.524±0.017                 | 0.491±0.020                | 0.536±0.013                 |
| I36γ2 | 0.740±0.002                   | 0.728±0.011                 | 0.742±0.009                 | 0.737±0.008                 | 0.719±0.009                | 0.748±0.006                 |
| L43δ1 | 0.568±0.009                   | 0.554±0.006                 | 0.524±0.005                 | 0.604±0.006                 | 0.540±0.005                | 0.508±0.006                 |
| L43δ2 | 0.449±0.027                   | 0.441±0.022                 | 0.455±0.022                 | 0.445±0.026                 | 0.461±0.023                | 0.459±0.022                 |
| I44δ1 | 0.195±0.048                   | 0.201±0.030                 | 0.205±0.027                 | 0.222±0.031                 | 0.231±0.030                | 0.263±0.021                 |
| I44γ2 | 0.629±0.005                   | 0.649±0.018                 | 0.621±0.016                 | 0.653±0.018                 | 0.641±0.016                | 0.631±0.016                 |
| A46β  | 0.780±0.005                   | 0.790±0.048                 | 0.786±0.047                 | 0.782±0.042                 | 0.760±0.043                | 0.766±0.042                 |
| L50δ1 | 0.693±0.013                   | 0.689±0.005                 | 0.707±0.007                 | 0.698±0.004                 | 0.721±0.007                | 0.608±0.007                 |
| L50δ2 | 0.671±0.007                   | 0.695±0.008                 | 0.701±0.007                 | 0.698±0.008                 | 0.667±0.008                | 0.673±0.033                 |

|                |                   |                   |                   |                   |                   |                   |
|----------------|-------------------|-------------------|-------------------|-------------------|-------------------|-------------------|
| L56 $\delta$ 1 | 0.534 $\pm$ 0.007 | 0.546 $\pm$ 0.012 | 0.580 $\pm$ 0.010 | 0.609 $\pm$ 0.011 | 0.524 $\pm$ 0.017 | 0.590 $\pm$ 0.006 |
| L56 $\delta$ 2 | 0.524 $\pm$ 0.007 | 0.550 $\pm$ 0.021 | 0.546 $\pm$ 0.021 | 0.589 $\pm$ 0.022 | 0.552 $\pm$ 0.023 | 0.554 $\pm$ 0.009 |
| I61 $\delta$ 1 | 0.505 $\pm$ 0.025 | 0.536 $\pm$ 0.004 | 0.576 $\pm$ 0.004 | 0.604 $\pm$ 0.004 | 0.612 $\pm$ 0.009 | 0.667 $\pm$ 0.010 |
| I61 $\gamma$ 2 | 0.719 $\pm$ 0.016 | 0.762 $\pm$ 0.019 | 0.752 $\pm$ 0.021 | 0.752 $\pm$ 0.013 | 0.736 $\pm$ 0.016 | 0.774 $\pm$ 0.018 |
| L67 $\delta$ 1 | 0.243 $\pm$ 0.037 | 0.259 $\pm$ 0.024 | 0.261 $\pm$ 0.041 | 0.291 $\pm$ 0.035 | 0.286 $\pm$ 0.037 | 0.336 $\pm$ 0.033 |
| L67 $\delta$ 2 | 0.233 $\pm$ 0.022 | 0.257 $\pm$ 0.040 | 0.267 $\pm$ 0.044 | 0.291 $\pm$ 0.044 | 0.302 $\pm$ 0.041 | 0.324 $\pm$ 0.041 |
| L69 $\delta$ 2 | 0.526 $\pm$ 0.012 | 0.546 $\pm$ 0.023 | 0.540 $\pm$ 0.011 | 0.564 $\pm$ 0.022 | 0.495 $\pm$ 0.016 | 0.560 $\pm$ 0.019 |
| V70 $\gamma$ 2 | 0.336 $\pm$ 0.034 | 0.368 $\pm$ 0.011 | 0.395 $\pm$ 0.012 | 0.400 $\pm$ 0.013 | 0.411 $\pm$ 0.008 | 0.455 $\pm$ 0.008 |
| L71 $\delta$ 1 | 0.233 $\pm$ 0.002 | 0.241 $\pm$ 0.023 | 0.241 $\pm$ 0.014 | 0.262 $\pm$ 0.015 | 0.265 $\pm$ 0.015 | 0.285 $\pm$ 0.019 |
| L73 $\delta$ 1 | 0.108 $\pm$ 0.029 | 0.116 $\pm$ 0.022 | 0.106 $\pm$ 0.023 | 0.123 $\pm$ 0.031 | 0.124 $\pm$ 0.031 | 0.128 $\pm$ 0.012 |
| L73 $\delta$ 2 | 0.144 $\pm$ 0.011 | 0.156 $\pm$ 0.011 | 0.158 $\pm$ 0.007 | 0.138 $\pm$ 0.031 | 0.140 $\pm$ 0.026 | 0.150 $\pm$ 0.035 |

<sup>a</sup> Calculated using the appropriate macromolecular diffusion tensor determined by <sup>15</sup>N relaxation (see Table S1). Errors were determined by Monte Carlo sampling of T<sub>1</sub> and T<sub>1 $\rho$</sub>  based on errors estimated from replicate sampling.



**Table S3.** Pressure dependence of the 3-Gaussian distribution of methyl symmetry axis squared generalized order parameters in ubiquitin.<sup>a</sup>

|         | Fitted parameters | Pressure (kbar) |            |            |            |            |            |
|---------|-------------------|-----------------|------------|------------|------------|------------|------------|
|         |                   | 0.001           | 0.4        | 0.8        | 1.2        | 1.6        | 2.5        |
| J-class | $J_A$             | 4.82±3.31       | 5.65±7.71  | 5.47±2.11  | 6.13±1.00  | 4.75±0.88  | 3.47±1.23  |
|         | $J_0$             | 0.21±0.03       | 0.22±0.09  | 0.22±0.03  | 0.22±0.01  | 0.22±0.01  | 0.35±0.20  |
|         | $J$               | 0.09±0.10       | 0.07±0.13  | 0.07±0.04  | 0.07±0.01  | 0.07±0.02  | 0.21±0.22  |
| α-class | $\alpha_A$        | 6.96±1.38       | 7.98±3.49  | 8.10±1.33  | 7.02±0.08  | 8.78±0.42  | 7.41±18.01 |
|         | $\alpha_0$        | 0.53±0.07       | 0.51±0.02  | 0.53±0.04  | 0.56±0.01  | 0.52±0.00  | 0.58±0.19  |
|         | $\alpha$          | 0.14±0.13       | 0.10±0.12  | 0.11±0.07  | 0.15±0.02  | 0.11±0.01  | 0.07±0.16  |
| ω-class | $\omega_A$        | 9.56±3.13       | 10.15±1.13 | 11.20±1.48 | 11.81±0.58 | 14.05±0.26 | 10.10±1.77 |
|         | $\omega_0$        | 0.75±0.05       | 0.74±0.03  | 0.77±0.04  | 0.76±0.01  | 0.76±0.01  | 0.75±0.16  |
|         | $\omega$          | 0.09±0.04       | 0.10±0.03  | 0.08±0.04  | 0.07±0.01  | 0.07±0.01  | 0.11±0.15  |
|         | R                 | 0.99            | 0.99       | 0.99       | 1          | 1          | 0.99       |

<sup>a</sup> The fitting function

is

$$Occurences(O_{axis}^2) = J_A \times \exp(-(x - J_0)^2 / J^2) + \alpha_A \times \exp(-(x - \alpha_0)^2 / \alpha^2) + \omega_A \times \exp(-(x - \omega_0)^2 / \omega^2)$$

where  $J_A$ ,  $\alpha_A$  and  $\omega_A$  are the amplitudes;  $J_0$ ,  $\alpha_0$  and  $\omega_0$  are the centers;  $J$ ,  $\alpha$ ,  $\omega$  are the widths of the J,  $\alpha$  and  $\omega$ -classes, respectively. KaleidaGraph was used for curve fitting and regression error analysis.

**Table S4.** Pressure dependence of methyl symmetry axis squared generalized order parameters of ubiquitin.<sup>a</sup>

| ID    | Degree of Polynomial | First Order (kbar <sup>-1</sup> ) | Second Order <sup>b</sup> (kbar <sup>-2</sup> ) | Third Order <sup>b</sup> (kbar <sup>-3</sup> ) | R    | P <sub>3v1</sub> <sup>c</sup> | P <sub>2v1</sub> <sup>c</sup> | P <sub>3v2</sub> <sup>c</sup> |
|-------|----------------------|-----------------------------------|-------------------------------------------------|------------------------------------------------|------|-------------------------------|-------------------------------|-------------------------------|
| I3δ1  | 1                    | 0.0289±0.0195                     | n.a.                                            | n.a.                                           | 0.87 | 0.43                          | 0.37                          | 0.59                          |
| I3γ2  | 3                    | 0.0998±0.1739                     | -0.150±0.061                                    | 0.043±0.026                                    | 0.96 | 0.05                          | 0.47                          | 0.06                          |
| V5γ1  | 1                    | 0.0047±0.007                      | n.a.                                            | n.a.                                           | 0.33 | 0.20                          | 0.48                          | 0.23                          |
| V5γ2  | 1                    | -0.0072±0.0039                    | n.a.                                            | n.a.                                           | 0.67 | 0.31                          | 0.74                          | 0.29                          |
| T7γ2  | 1                    | 0.0359±0.0019                     | n.a.                                            | n.a.                                           | 0.91 | 0.42                          | n.a.                          | 0.36                          |
| L8δ1  | 1                    | 0.0576±0.0139                     | n.a.                                            | n.a.                                           | 0.98 | 0.43                          | 0.35                          | 0.60                          |
| T9γ2  | 1                    | 0.0069±0.0123                     | n.a.                                            | n.a.                                           | 0.69 | 0.94                          | 0.80                          | 0.91                          |
| I13δ1 | 2                    | 0.0425±0.0306                     | -0.010±0.013                                    | n.a.                                           | 0.98 | 0.03                          | 0.04                          | 0.14                          |
| I13γ2 | 3                    | 0.1579±0.1667                     | -0.135±0.042                                    | 0.035±0.019                                    | 0.99 | 0.05                          | 0.81                          | 0.05                          |
| T14γ2 | 3                    | 0.1062±0.1532                     | -0.145±0.033                                    | 0.041±0.013                                    | 0.99 | 0.01                          | 0.61                          | 0.01                          |
| L15δ1 | 1                    | -0.0297±0.0076                    | n.a.                                            | n.a.                                           | 0.83 | 0.85                          | 0.90                          | 0.72                          |
| L15δ2 | 1                    | -0.0155±0.0088                    | n.a.                                            | n.a.                                           | 0.94 | 0.13                          | 0.88                          | 0.13                          |
| V17γ1 | 3                    | 0.1934±0.1703                     | -0.208±0.041                                    | 0.054±0.018                                    | 0.97 | 0.03                          | 0.69                          | 0.03                          |
| V17γ2 | 1                    | -0.0086±0.0106                    | n.a.                                            | n.a.                                           | 0.57 | 0.24                          | 0.21                          | 0.46                          |
| T22γ2 | 1                    | 0.0015±0.0064                     | n.a.                                            | n.a.                                           | 0.05 | 0.12                          | 0.18                          | 0.24                          |
| I23δ1 | 1                    | 0.0255±0.0093                     | n.a.                                            | n.a.                                           | 0.96 | 0.11                          | 0.29                          | 0.16                          |
| I23γ2 | 3                    | 0.0725±0.2207                     | -0.096±0.052                                    | 0.027±0.019                                    | 0.97 | 0.04                          | 0.78                          | 0.04                          |
| V26γ1 | 1                    | -0.0142±0.0077                    | n.a.                                            | n.a.                                           | 0.77 | 0.14                          | 0.06                          | 0.89                          |
| I30δ1 | 1                    | 0.0054±0.0023                     | n.a.                                            | n.a.                                           | 0.41 | 0.10                          | 0.09                          | 0.33                          |
| I30γ2 | 1                    | -0.005±0.0039                     | n.a.                                            | n.a.                                           | 0.30 | 0.46                          | 0.37                          | 0.63                          |
| I36δ1 | 1                    | 0.0199±0.0064                     | n.a.                                            | n.a.                                           | 0.79 | 0.50                          | n.a.                          | 0.42                          |
| I36γ2 | 1                    | 0.0018±0.0032                     | n.a.                                            | n.a.                                           | 0.14 | 0.35                          | 0.36                          | 0.47                          |
| L43δ1 | 1                    | -0.0181±0.0036                    | n.a.                                            | n.a.                                           | 0.48 | 0.59                          | 0.54                          | 0.63                          |
| L43δ2 | 1                    | 0.0059±0.0117                     | n.a.                                            | n.a.                                           | 0.66 | 0.65                          | 0.92                          | 0.55                          |
| I44δ1 | 1                    | 0.0275±0.0168                     | n.a.                                            | n.a.                                           | 0.98 | 0.11                          | 0.06                          | 0.53                          |
| I44γ2 | 1                    | 0.0001±0.0071                     | n.a.                                            | n.a.                                           | 0.00 | 0.72                          | 0.52                          | 0.89                          |
| A46β  | 1                    | -0.0095±0.0181                    | n.a.                                            | n.a.                                           | 0.73 | 0.08                          | 0.81                          | 0.08                          |
| L50δ1 | 2                    | -0.0431±0.0333                    | -0.039±0.013                                    | n.a.                                           | 0.98 | 0.03                          | 0.06                          | 0.13                          |
| L50δ2 | 1                    | -0.0052±0.0119                    | n.a.                                            | n.a.                                           | 0.32 | 0.06                          | 0.34                          | 0.08                          |

|       |   |                |              |             |      |      |      |      |
|-------|---|----------------|--------------|-------------|------|------|------|------|
| L56δ1 | 1 | 0.0153±0.0042  | n.a.         | n.a.        | 0.40 | 0.49 | 0.77 | 0.43 |
| L56δ2 | 1 | 0.0100±0.0061  | n.a.         | n.a.        | 0.44 | 0.35 | 0.21 | 0.77 |
| I61δ1 | 1 | 0.0637±0.008   | n.a.         | n.a.        | 0.98 | 0.17 | 0.14 | 0.43 |
| I61γ2 | 3 | 0.1374±0.164   | -0.139±0.037 | 0.037±0.015 | 0.97 | 0.05 | 0.92 | 0.05 |
| L67δ1 | 1 | 0.036±0.0169   | n.a.         | n.a.        | 0.98 | 0.59 | 0.46 | 0.71 |
| L67δ2 | 1 | 0.0364±0.018   | n.a.         | n.a.        | 0.98 | 0.15 | 0.07 | 0.79 |
| L69δ2 | 1 | 0.0046±0.0087  | n.a.         | n.a.        | 0.17 | 0.32 | 0.79 | 0.30 |
| V70γ2 | 3 | 0.1148±0.1432  | -0.069±0.045 | 0.017±0.016 | 0.98 | 0.05 | 0.40 | 0.07 |
| L71δ1 | 1 | 0.0212±0.0079  | n.a.         | n.a.        | 0.98 | 0.73 | 0.80 | 0.63 |
| L73δ1 | 1 | 0.0083±0.0108  | n.a.         | n.a.        | 0.83 | 0.14 | 0.78 | 0.13 |
| L73δ2 | 1 | -0.0016±0.0137 | n.a.         | n.a.        | 0.17 | 0.79 | 0.88 | 0.67 |

<sup>a</sup>  $O_{axis}^2$  against pressure was fitted using KaleidaGraph. Errors were estimated from Monte Carlo sampling. Quadratic and cubic terms for data that do not require second or third order curve fitting are designated as ‘not applicable’ (n.a.).

<sup>b</sup> Raw fitted coefficients are listed i.e. not corrected for the leading (1/2) and (1/6) factors of the Taylor series expansion

<sup>c</sup> The best fitting polynomial model for each methyl was determined by pair wise comparison of statistic p values of cubic versus linear ( $p_{3v1}$ ), quadratic versus linear ( $p_{2v1}$ ) and cubic versus quadratic ( $p_{3v2}$ ) (see Methods). The p-value entries shown as ‘not applicable’ (n.a.) correspond to sites with negative F-values.

**Table S5.** Summary of pressure dependence of methyl side chain dynamics in ubiquitin.

| Linear Response to Pressure                                                                                                                                                                                                                                                                                       |                                                                                                   |                                                                                                                         | Non-linear Response to Pressure                   |                                                                                                     |
|-------------------------------------------------------------------------------------------------------------------------------------------------------------------------------------------------------------------------------------------------------------------------------------------------------------------|---------------------------------------------------------------------------------------------------|-------------------------------------------------------------------------------------------------------------------------|---------------------------------------------------|-----------------------------------------------------------------------------------------------------|
| Linear <sup>a</sup>                                                                                                                                                                                                                                                                                               | Outliers <sup>b</sup>                                                                             | Structural Change <sup>c</sup>                                                                                          | Structural Change <sup>c</sup>                    | Others                                                                                              |
| V5 $\gamma$ 1, V5 $\gamma$ 2,<br>T9 $\gamma$ 2, V17 $\gamma$ 2,<br>T22 $\gamma$ 2, I23 $\delta$ 1,<br>V26 $\delta$ 1, I30 $\delta$ 1,<br>L43 $\delta$ 2, I44 $\delta$ 1,<br>I44 $\gamma$ 2, A46 $\beta$ ,<br>L50 $\delta$ 2, L56 $\delta$ 1,<br>L56 $\delta$ 2, L67 $\delta$ 1,<br>L67 $\delta$ 2, L69 $\delta$ 2 | I3 $\delta$ 1, T7 $\gamma$ 2,<br>L8 $\delta$ 1, L15 $\delta$ 1,<br>I61 $\delta$ 1, L73 $\delta$ 1 | L15 $\delta$ 2, I30 $\gamma$ 2,<br>I36 $\delta$ 1, I36 $\gamma$ 2,<br>L43 $\delta$ 1, L71 $\delta$ 1,<br>L73 $\delta$ 2 | I13 $\delta$ 1, T14 $\gamma$ 2,<br>V70 $\gamma$ 2 | I3 $\gamma$ 2, I13 $\gamma$ 2,<br>V17 $\gamma$ 1, I23 $\gamma$ 2,<br>L50 $\delta$ 1, I61 $\gamma$ 2 |

<sup>a</sup> Corresponding to the eighteen sites that have a linear correlation between  $O^2_{axis}$  at 1 bar and  $dO^2_{axis}/dP$  ( $R > 0.9$ ) as seen in Fig. 4.

<sup>b</sup> The six methyls identified as outliers in Fig 4.

<sup>c</sup> Methyls that are experiencing significant pressure-induced structural change determined by superimposition of the 1 bar crystal structure (1UBQ) upon the ten models of 3 kbar NMR structure ensemble (1V81). Methyls that have a structural change greater than 3 Å in at least 5 out of total 10 compared structure pairs were considered to have significant structural change.

**Table S6.** Numerical grouping of the methyl-bearing side chains of ubiquitin according to the values of their methyl symmetry axis order parameters at 1 bar and their corresponding pressure sensitivity.<sup>a</sup>

| Parameter             | Group 1                                                                              | Group 2                                                                                                                                                                                                                 | Group 3                                                                                                                                                                                                     | Group 4                                                                                                                                     | Group 5                          |
|-----------------------|--------------------------------------------------------------------------------------|-------------------------------------------------------------------------------------------------------------------------------------------------------------------------------------------------------------------------|-------------------------------------------------------------------------------------------------------------------------------------------------------------------------------------------------------------|---------------------------------------------------------------------------------------------------------------------------------------------|----------------------------------|
| $O^2_{axis}$ at 1 bar | I3 $\gamma$ 2, T14 $\gamma$ 2,<br>I13 $\delta$ 1, I13 $\gamma$ 2,                    | I3 $\delta$ 1, V5 $\gamma$ 1, V5 $\gamma$ 2,<br>T7 $\gamma$ 2, V17 $\gamma$ 2,<br>T22 $\gamma$ 2, V26 $\gamma$ 1,<br>I30 $\delta$ 1, I30 $\gamma$ 2,<br>I36 $\gamma$ 2, I44 $\gamma$ 2,<br>A46 $\beta$ , L50 $\delta$ 2 | T9 $\gamma$ 2, L15 $\delta$ 1,<br>L15 $\delta$ 2, I23 $\delta$ 1,<br>I36 $\delta$ 1, L43 $\delta$ 1,<br>L43 $\delta$ 2, L56 $\delta$ 1,<br>L56 $\delta$ 2, I61 $\delta$ 1,<br>L69 $\delta$ 2                | L8 $\delta$ 1, I44 $\delta$ 1, L67 $\delta$ 1,<br>L67 $\delta$ 2, L71 $\delta$ 1, L73 $\delta$ 1,<br>L73 $\delta$ 2                         |                                  |
| $dO^2_{axis}/dP$      | V17 $\gamma$ 1,<br>I23 $\gamma$ 2, L50 $\delta$ 1,<br>I61 $\gamma$ 2, V70 $\gamma$ 2 | V5 $\gamma$ 2, L15 $\delta$ 1,<br>L15 $\delta$ 2, V17 $\gamma$ 2,<br>V26 $\gamma$ 1, I30 $\gamma$ 2,<br>L43 $\delta$ 1, A46 $\beta$ ,<br>L50 $\delta$ 2                                                                 | V5 $\gamma$ 1, T9 $\gamma$ 2,<br>T22 $\gamma$ 2, I30 $\delta$ 1,<br>I36 $\gamma$ 2, L43 $\delta$ 2,<br>I44 $\gamma$ 2, L56 $\delta$ 1,<br>L56 $\delta$ 2, L69 $\delta$ 2,<br>L73 $\delta$ 1, L73 $\delta$ 2 | I3 $\delta$ 1, T7 $\gamma$ 2,<br>I23 $\delta$ 1, I36 $\delta$ 1,<br>I44 $\delta$ 1,<br>L67 $\delta$ 1,<br>L67 $\delta$ 2,<br>L71 $\delta$ 1 | L8 $\delta$ 1,<br>I61 $\delta$ 1 |

<sup>a</sup> Methyls that have a non-linear pressure sensitivity are grouped in group 1. The remaining methyls were numerically grouped into 4 sets based on their  $dO^2_{axis}/dP$  values and into 3 groups based on their  $O^2_{axis}$  parameters seen at ambient pressure. These groups were then subjected to spatial clustering analysis.
